# Supplementary material for: The Leader Peptide peTrpL Forms Antibiotic-Containing Ribonucleoprotein Complexes for Posttranscriptional Regulation of Multiresistance Genes
Source: PubMed Central journal article supplement (PMC7298713; doi:10.1128/mbio.01027-20), 2020-06-16

Figure S1

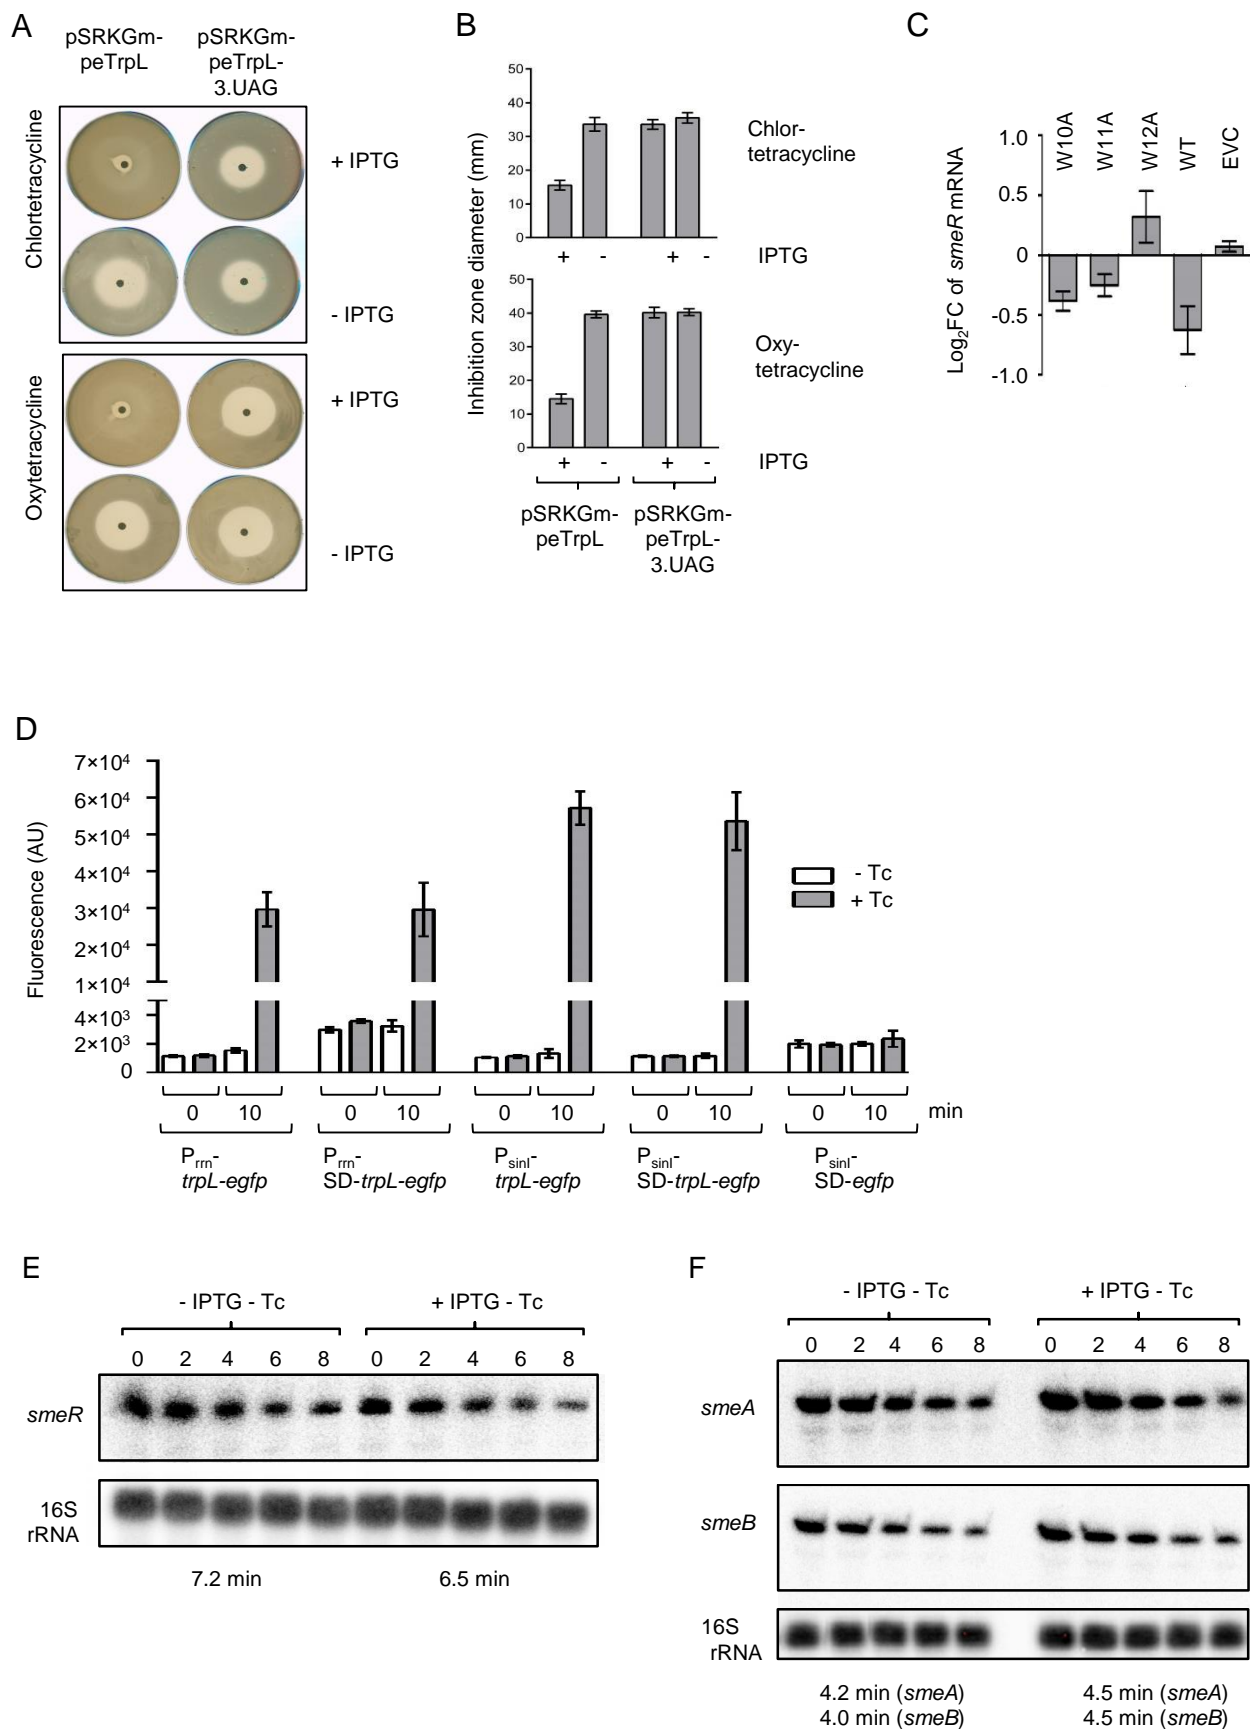

Supplement: mBio.01027-20-sf001.pdf [file mBio.01027-20-sf001.pdf]
