# Supplementary material for: The Leader Peptide peTrpL Forms Antibiotic-Containing Ribonucleoprotein Complexes for Posttranscriptional Regulation of Multiresistance Genes
Source: PubMed Central journal article supplement (PMC7298713; doi:10.1128/mbio.01027-20), 2020-06-16
Supplement: mBio.01027-20-st001.pdf [file mBio.01027-20-st001.pdf]

**Table S1. Strains and plasmids used in this work.**

| <b>Strains</b>                                          | <b>Ref.</b>   | <b>Description</b>                                                                                                                                                                                                                      |
|---------------------------------------------------------|---------------|-----------------------------------------------------------------------------------------------------------------------------------------------------------------------------------------------------------------------------------------|
| <i>Sinorhizobium meliloti</i> 2011                      | [1]           | Strain Rm2011, contains insertion sequence within <i>expR</i> gene, parental strain in this study; Sm <sup>r</sup> .                                                                                                                    |
| <i>Sinorhizobium meliloti</i> 2011 $\Delta$ <i>trpL</i> | [2]           | $\Delta$ <i>trpL</i> mutant of strain 2011; Sm <sup>r</sup> .                                                                                                                                                                           |
| <i>Agrobacterium tumefaciens</i> NTL4                   | [3]           | Used for analysis of Atu-peTrpL.                                                                                                                                                                                                        |
| <i>Bradyrhizobium japonicum</i> USDA 110spc4            | [4]           | Used for analysis of Bja-peTrpL; Sp <sup>r</sup> .                                                                                                                                                                                      |
| <i>Escherichia coli</i> DH5 $\alpha$                    | Thermo Fisher | Used for cloning; <i>fhuA2 lac(del)U169 phoA glnV44 <math>\Phi</math>80' lacZ(del)M15 gyrA96 recA1 relA1 endA1 thi-1 hsdR17</i> .                                                                                                       |
| <i>Escherichia coli</i> S17-1                           | [5]           | <i>E. coli</i> 294 Thi RP4-2-Tc::Mu-Km::Tn7 integrated into the chromosome.                                                                                                                                                             |
| <b>Plasmids</b>                                         | <b>Ref.</b>   | <b>Description</b>                                                                                                                                                                                                                      |
| pRK4352                                                 | [6]           | Broad host range plasmid with <i>rrn</i> promoter from <i>Rhodobacter sphaeroides</i> ; Tc <sup>r</sup> .                                                                                                                               |
| pRK-rnTrpL (synonym pRK-SmeIRcsR1)                      | [7]           | pRK4352 derivative for constitutive production of rnTrpL (previously SmeIRcsR1) and peTrpL; Tc <sup>r</sup> .                                                                                                                           |
| pRK-trpL-egfp                                           | [2]           | pRK4352 derivative; contains a translational <i>S. meliloti trpL::egfp</i> fusion harboring the first 6 codons of <i>trpL</i> fused to the third codon of <i>egfp</i> ; the <i>trpL::egfp</i> transcript is leaderless; Tc <sup>r</sup> |
| pRK-SDtrpL-egfp                                         | This work     | pRK4352 derivative similar to pRK-trpL-egfp, with exception of a typical Shine-Dalgarno sequence in the transcript, upstream of the <i>trpL</i> start codon; Tc <sup>r</sup> .                                                          |
| pSRKTc                                                  | [8]           | Broad host range expression vector with tightly regulated, IPTG inducible <i>lacZ</i> promoter; Tc <sup>r</sup>                                                                                                                         |
| pSRKTc-peTrpL                                           | This work     | pSRKTc derivative; contains a recombinant ORF encoding the <i>S. meliloti</i> peTrpL peptide, cloned in frame with the ATG of the NdeI restriction site; Tc <sup>r</sup> .                                                              |
| pSRKTc-Atu-peTrpL                                       | This work     | pSRKTc derivative; contains a recombinant ORF encoding the <i>A. tumefaciens</i> peTrpL peptide, cloned in frame with the ATG of the NdeI restriction site; Tc <sup>r</sup> .                                                           |
| pSRKTc-Bja-peTrpL                                       | This work     | pSRKTc derivative; contains a recombinant ORF encoding the <i>B. japonicum</i> peTrpL peptide, cloned in frame with the ATG of the NdeI restriction site; Tc <sup>r</sup> .                                                             |
| pSRKGm                                                  | [8]           | Broad host range expression vector with tightly regulated, IPTG inducible <i>lacZ</i> promoter; Gm <sup>r</sup>                                                                                                                         |
| pSRKGm-peTrpL                                           | This work     | pSRKGm derivative; contains a recombinant ORF encoding the <i>S. meliloti</i> peTrpL peptide, cloned in frame with the ATG of the NdeI restriction site; Gm <sup>r</sup> .                                                              |
| pSRKGm-peTrpL-3.UAG                                     | This work     | pSRKGm-peTrpL derivative, in which the third codon is replaced by a stop codon; Gm <sup>r</sup> .                                                                                                                                       |
| pSRKGm-peTrpL-W10A                                      | This work     | pSRKGm-peTrpL derivative, in which the 10. (tryptophan) codon is replaced by an alanine codon; Gm <sup>r</sup> .                                                                                                                        |
| pSRKGm-peTrpL-W11A                                      | This work     | pSRKGm-peTrpL derivative, in which the 11. (tryptophan) codon is replaced by an alanine codon; Gm <sup>r</sup> .                                                                                                                        |
| pSRKGm-peTrpL-W12A                                      | This work     | pSRKGm-peTrpL derivative, in which the 12. (tryptophan) codon is replaced by an alanine codon; Gm <sup>r</sup> .                                                                                                                        |
| pSRKGm-3xFLAG-peTrpL                                    | This work     | pSRKGm-peTrpL derivative for production of 3xFLAG-peTrpL; Gm <sup>r</sup> .                                                                                                                                                             |
| pSRKGm-3xFLAG-peTrpL-W10A                               | This work     | pSRKGm-3xFLAG-peTrpL derivative, in which the 10. (tryptophan) codon is replaced by an alanine codon; Gm <sup>r</sup> .                                                                                                                 |
| pSRKGm-3xFLAG-peTrpL-W12A                               | This work     | pSRKGm-3xFLAG-peTrpL derivative, in which the 12. (tryptophan) codon is replaced by an alanine codon; Gm <sup>r</sup> .                                                                                                                 |
| pSRKGm-3xFLAG                                           | This work     | pSRKGm derivative, contains an ORF encoding a 3xFLAG peptide; Gm <sup>r</sup> .                                                                                                                                                         |
| pSRKGm-MS2as-smeR                                       | This work     | pSRKGm derivative; used for IPTG-induced transcription of MS2-as-smeR RNA; Gm <sup>r</sup> .                                                                                                                                            |

|                               |                              |                                                                                                                                                                                                                                                                                                            |
|-------------------------------|------------------------------|------------------------------------------------------------------------------------------------------------------------------------------------------------------------------------------------------------------------------------------------------------------------------------------------------------|
| pSRKTc-3xFLAG-peTrpL          | This work                    | pSRKTc-peTrpL derivative for production of 3xFLAG-peTrpL; Tc <sup>r</sup> .                                                                                                                                                                                                                                |
| pSUP202pol4                   | [9]                          | Suicide plasmid, allows for construction of integration vectors; Tc <sup>r</sup> .                                                                                                                                                                                                                         |
| pSUP202pol4-exoP              | This work;                   | pSUP202pol4 derivative, contains 300 nt of the 3' <i>exoP</i> region as an chromosomal integration site in <i>S. meliloti</i> [10]; Tc <sup>r</sup> .                                                                                                                                                      |
| pSUP-PasRegfp                 | This work                    | pSUP202pol4-exoP derivative, contains a transcriptional fusion of <i>egfp</i> to the promoter P <sub>as</sub> (-290 to +2 in respect to the putative asRNA transcription start site, as determined by RNAseq of CoIP RNA); the <i>egfp</i> ORF is preceded by a Shine-Dalgarno sequence, Tc <sup>r</sup> . |
| pSW2                          | S.B.W and E.E.H, unpublished | pSRKGm derivative, in which the <i>E. coli lacZ</i> operon module was replaced by the constitutive promoter P <sub>sinI</sub> followed by XbaI and BamHI restriction sites and a transcription terminator; Gm <sup>r</sup> .                                                                               |
| pSW2-trpL-egfp                | This work                    | pSW2 derivative, allows for constitutive transcription of the leaderless <i>trpL::egfp</i> fusion from P <sub>sinI</sub> ; the fusion contains the first 6 codons of <i>trpL</i> fused to the third codon of <i>egfp</i> ; Gm <sup>r</sup> .                                                               |
| pSW2-SDtrpL-egfp              | This work                    | Similar to pSW2-trpL-egfp, but the constitutively transcribed <i>trpL::egfp</i> is preceded by a Shine-Dalgarno sequence; Gm <sup>r</sup> .                                                                                                                                                                |
| pRS-SDegfp                    | This work                    | pSW2 derivative, in which <i>egfp</i> preceded by a Shine-Dalgarno sequence is constitutively transcribed from P <sub>sinI</sub> ; kindly provided by Robina Scheuer ; Gm <sup>r</sup> .                                                                                                                   |
| pRJ-MCS (synonym pRJPaph-MCS) | [11]                         | Integration vector for <i>B. japonicum</i> ; contains a constitutive <i>nptII</i> promoter; Tc <sup>r</sup> .                                                                                                                                                                                              |
| pRJ-Bja-peTrpL                | This work                    | pRJ-MCS derivative for constitutive overproduction of peTrpL in <i>B. japonicum</i> ; Tc <sup>r</sup> .                                                                                                                                                                                                    |
| pLK46                         | [12]                         | Contains <i>egfp</i> with GC rich codons; Tc <sup>r</sup> .                                                                                                                                                                                                                                                |

## References:

1. Casse F, Boucher C, Julliot JS, Michel M, Denarie J. 1979. Identification and characterization of large plasmids in *Rhizobium meliloti* using agarose-gel electrophoresis. *Gen Microbiol* 113: 229-242.
2. Melior H, Li S, Madhugiri R, Stötzl M, Azarderakhsh S, Barth-Weber S, Baumgardt K, Ziebuhr J, Evgenieva-Hackenberg E. 2019. Transcription attenuation-derived small RNA mTrpL regulates tryptophan biosynthesis gene expression in *trans*. *Nucleic Acids Res* 47: 6396-6410.
3. Cha C, Gao P, Chen YC, Shaw PD, Farrand SK. 1998. Production of acyl-homoserine lactone quorum-sensing signals by gram-negative plant-associated bacteria. *Mol Plant Microbe Interact* 11: 1119-1129.
4. Regensburger B, Hennecke H. 1983. RNA polymerase from *Rhizobium japonicum*. *Arch Microbiol* 135: 103-109.
5. Simon R, Prierer U, Pühler A. 1982. A broad host range mobilization system for *in vivo* genetic engineering: transposon mutagenesis in gram-negative bacteria. *Biotechnology* 1: 784-791.

6. Mank NN, Berghoff BA, Hermanns YN, Klug G. 2012. Regulation of bacterial photosynthesis genes by the small noncoding RNA PcrZ. *Proc. Natl Acad Sci U S A* 109: 16306-16311.
7. Baumgardt K, Šmídová K, Rahn H, Lochnit G, Robledo M, Evguenieva-Hackenberg E (2016) The stress-related, rhizobial small RNA RcsR1 destabilizes the autoinducer synthase encoding mRNA *sinI* in *Sinorhizobium meliloti*. *RNA Biol* 13: 486-499.
8. Khan SR, Gaines J, Roop RM2<sup>nd</sup>, Farrand SK. 2008. Broad-host-range expression vectors with tightly regulated promoters and their use to examine the influence of TraR and TraM expression on Ti plasmid quorum sensing. *Appl Environ Microbiol* 74: 5053-5062.
9. Fischer HM, Babst M, Kaspar T, Acuna G, Arigoni F, Hennecke H. 1993. One member of a gro-ESL-like chaperonin multigene family in *Bradyrhizobium japonicum* is co-regulated with symbiotic nitrogen fixation genes. *EMBO J* 12: 2901-2912.
10. Schlüter JP, Czuppon P, Schauer O, Pfaffelhuber P, McIntosh M, Becker A. 2015. Classification of phenotypic subpopulations in isogenic bacterial cultures by triple promoter probing at single cell level. *J Biotechnol* 198: 3-14.
11. Hahn J, Thalmann S, Migur A, von Boeselager RF, Kubatova N, Kubareva E, Schwalbe H, Evguenieva-Hackenberg E. 2017. Conserved small mRNA with an unique, extended Shine-Dalgarno sequence. *RNA Biol* 14: 1353-1363.
12. McIntosh M, Krol E, Becker A. 2008. Competitive and cooperative effects in quorum-sensing-regulated galactoglucan biosynthesis in *Sinorhizobium meliloti*. *J Bacteriol* 190: 5308-5317.
